# Supplementary material
Source: PubMed Central journal article supplement (PMC3818865)
Supplement: mbt0004-0252-SD1.pdf [file mbt0004-0252-SD1.pdf]

**Supporting Information**

**Seeger *et al.*,**

**The biosynthetic genes for prenylated phenazines are located  
at two different chromosomal loci of *Streptomyces  
cinnamomensis* DSM 1042**

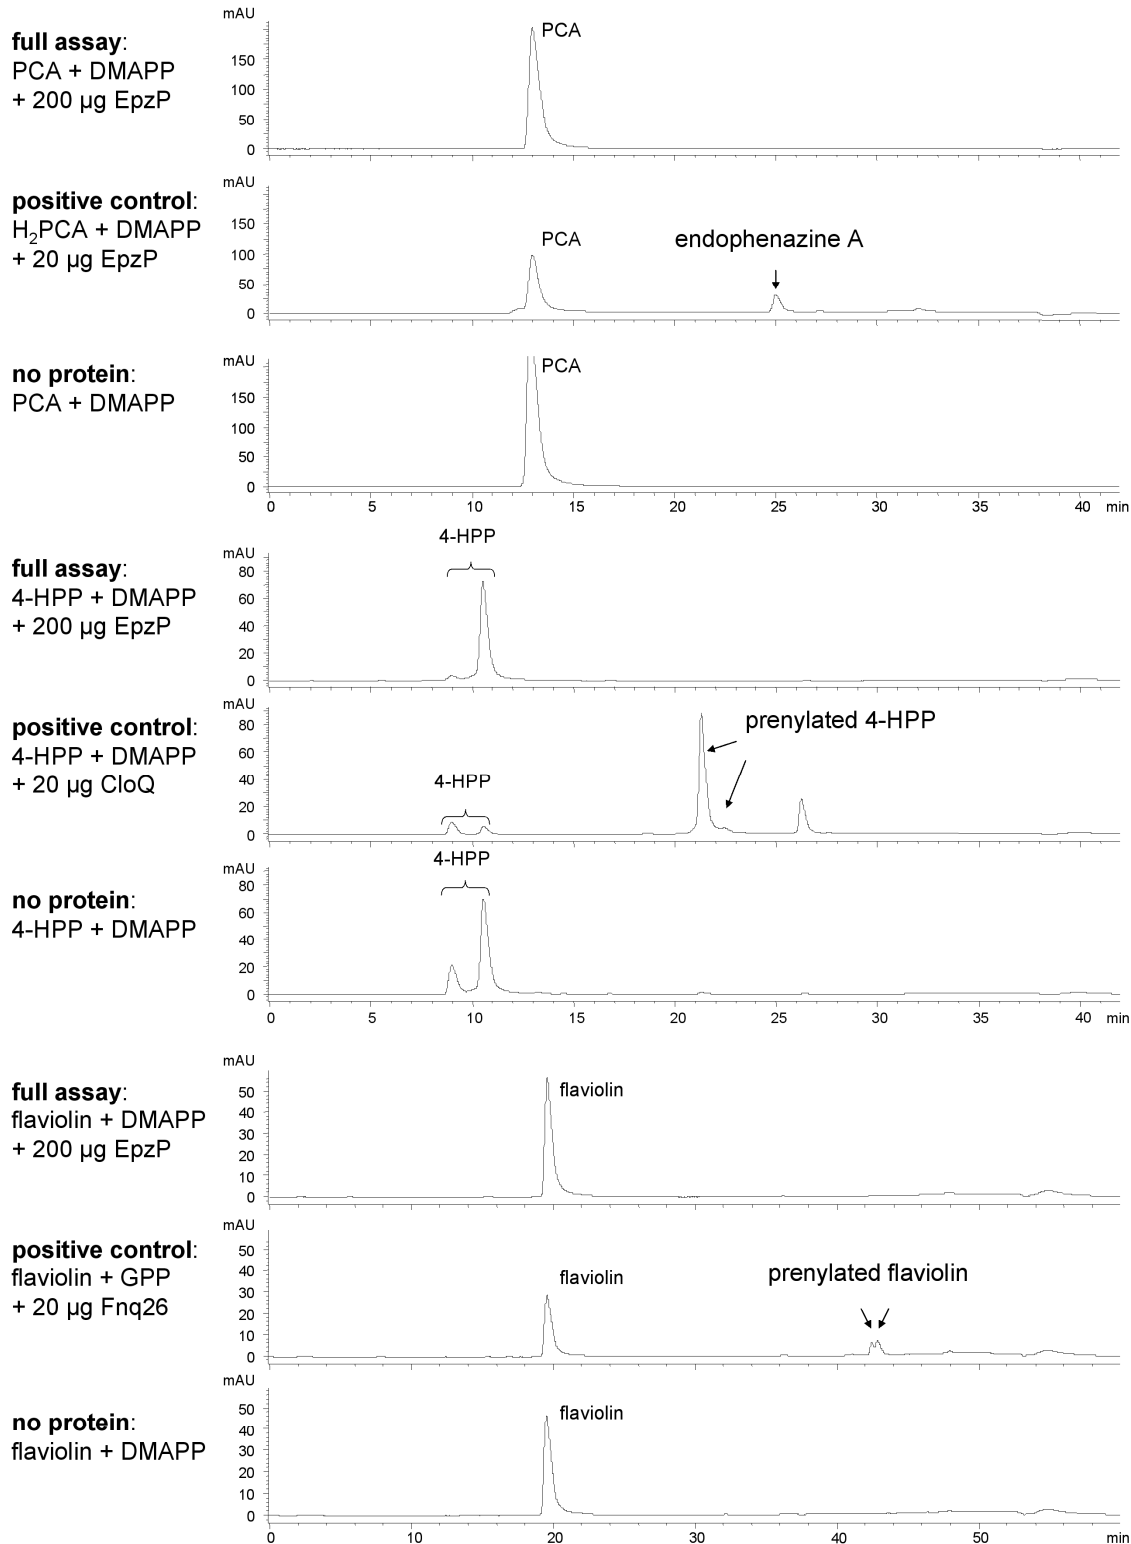

**Figure S1:** Activity of EpzP with different substrates.

EpzP prenylated 9,10-dihydro-phenazine-1-carboxylic acid ( $H_2$ PCA), but not phenazine-1-carboxylic acid (PCA), 4-hydroxyphenylpyruvate (4-HPP) or flaviolin. The prenylation of flaviolin with GPP by Fnq26 results in two structurally different prenylated products (Haagen et al., 2007). 4-HPP and its prenylated product show two peaks due to keto-enol tautomerism.

Detection in HPLC was carried out at 365 nm for PCA and endophenazine A, 308 nm for 4-HPP and its products, and 306 nm for flaviolin and its products. All assays contained 0.4 mM aromatic substrate and 0.4 mM isoprenoid substrate and were incubated for 30 min at 30°C. EpzP assays were performed with 500 mM NaCl and 100 mM TAPS pH 7.5, the assay with CloQ with 2 mM MgCl<sub>2</sub> and 75 mM Tris-HCl pH 7.5 and the assay with Fnq26 with 2 mM MgCl<sub>2</sub> and 100 mM TAPS pH 8.5, respectively.

| <b>endophenazine A formation</b>               |        |     |
|------------------------------------------------|--------|-----|
|                                                | (nmol) | (%) |
| 0 mM NaCl, 0 mM MgCl <sub>2</sub>              | 6.2    | 100 |
| 500 mM NaCl, 0 mM MgCl <sub>2</sub>            | 6.2    | 100 |
| 500 mM NaCl, 2 mM MgCl <sub>2</sub>            | 6.7    | 108 |
| 500 mM NaCl, 10 mM MgCl <sub>2</sub>           | 6.9    | 111 |
| 500 mM NaCl, 20 mM MgCl <sub>2</sub>           | 4.1    | 66  |
| 0 mM NaCl, 0 mM MgCl <sub>2</sub> , 10 mM EDTA | 4.8    | 77  |

**Table S1:** Influence of MgCl<sub>2</sub> and EDTA on the activity of EpzP.

Endophenazine A formation was assayed with 0.4 mM H<sub>2</sub>PCA, 1 mM DMAPP, 10 µg EpzP in 100 mM TAPS pH 7.5 (100 µl, 30 min, 30°C).

## References

Haagen, Y., Unsöld, I., Westrich, L., Gust, B., Richard, S. B., Noel, J. P., and Heide, L. (2007) A soluble, magnesium-independent prenyltransferase catalyzes reverse and regular C-prenylations and O-prenylations of aromatic substrates, *FEBS Lett.* **581**: 2889-2893.
